# Supplementary material for: The effects of alcohol consumption and its associations with disease activity among 979 patients with inflammatory arthritis
Source: HighWire-hosted journal article supplement (doi:10.1136/rmdopen-2020-001510), 2021-04-01
Supplement: rmdopen-2020-001510supp001_data_supplement.pdf [file rmdopen-2020-001510supp001_data_supplement.pdf]

**Table 1 Supplementary. Results from logistic univariate analysis of (A) high-risk drinking and (B) any drinking**

| A | Variable              | p       | OR (95% CI)    |
|---|-----------------------|---------|----------------|
|   | Diagnosis             |         |                |
|   | RA                    | 0.008   | 0.2 (0.1-0.7)  |
|   | PsA                   | 0.29    | 1.5 (0.7-3.1)  |
|   | AS                    | <0.0001 | 4.5 (2.0-10.0) |
|   | Male Gender           | 0.001   | 6.9 (2.4-19.4) |
|   | Low Disease Activity* | 0.038   | 6.1 (1.0-37.6) |
|   | Smoking               | 0.17    | 2.9 (0.6-13.8) |
|   | Presence of erosions  | 0.92    | 0.9 (0.3-1.4)  |
|   | Methotrexate use      | 0.083   | 0.5 (0.2-1.1)  |
| B | Variable              | p       | OR (95% CI)    |
|   | Diagnosis             |         |                |
|   | RA                    | 0.195   | 0.6 (0.3-1.3)  |
|   | PsA                   | 0.03    | 1.9 (1.1-3.5)  |
|   | AS                    | 0.03    | 0.5 (0.3-0.9)  |
|   | Male Gender           | 0.034   | 1.8 (1.1-3.1)  |
|   | Low Disease Activity* | 0.476   | 2.2 (0.2-19.4) |
|   | Smoking               | 0.155   | 1.7 (0.8-3.4)  |
|   | Presence of erosions  | 0.44    | 0.8 (0.5-1.4)  |
|   | Methotrexate use      | 0.541   | 0.8 (0.5-1.43) |

RA: rheumatoid arthritis, AS: ankylosing spondylitis, PsA: psoriatic arthritis.

Low Disease Activity\* as defined by DAS28-CRP  $\leq$  2.6 for patients with RA or PsA and as a BASDAI  $\leq$  4 for patients with AS.

**Table 2 Supplementary. Results from linear univariate analysis of alcohol consumption in weekly units**

| Variable          | p      | R <sup>2</sup> |
|-------------------|--------|----------------|
| Age               | 0.315  | 0.005          |
| DAS28-CRP         | 0.061  | 0.21           |
| TJC               | 0.676  | 0.001          |
| SJC               | 0.247  | 0.005          |
| CRP               | 0.669  | 0.001          |
| HAQ               | 0.0001 | 0.079          |
| Morning Stiffness | 0.721  | 0.001          |

DAS28-CRP: Disease activity score for a 28 joint count-based on C reactive protein, TJC: Tender joint count, SJC: swollen joint count, CRP: C reactive protein, HAQ: health assessment questionnaire.

**Table 3 Supplementary. Results from multivariate logistic analysis of high-risk alcohol use**

| Variable              | p     | OR (95% CI)      |
|-----------------------|-------|------------------|
| Rheumatoid Arthritis  | 0.648 | 0.7 (0.1-3.6)    |
| Male Gender           | 0.002 | 33.3 (3.6-307.4) |
| Low Disease Activity* | 0.046 | 9.3 (1.0-218.2)  |
| Smoking               | 0.082 | 8.7 (0.8-101.3)  |
| Methotrexate use      | 0.322 | 2.3 (0.4-13.3)   |
